Santos-Dumont is studied as a personality as well as an aviator. The author acknowledges advice from several authorities on his subject's mental make-up, a condition aptly capsulized in the sub-title of the book. Santos-Dumont's suicide, which actually stopped fighting briefly in the 1932 uprising against Vargas, was caused by his emotional distress over the warfare uses of "his invention," as well as by an increasingly severe medical state, diagnosed by the author and his medical authorities as sclerosis. The book is original in its analyses along these significant lines.

This book is also important in its attempt to fit Santos-Dumont into his just niche as an aeronautical pioneer. It attempts to strike a balance between the exalted image, with unfavorable shadows ignored, put forth in Brazil, and the unfortunate lack of recognition in this country for a man who indisputably did more than the Wrights to inspire by example the development of aviation. Santos-Dumont achieved considerable success with controlled lighter-than-air designs before his first true aeroplane flight, in France, late in 1906.

A helpful appendix lists and describes the aerial vehicles designed by Alberto Santos-Dumont. For photographic and contemporary journalistic coverage of Santos-Dumont's achievements, the Brazilian works on the aviator are better. These are referred to occasionally in sporadic footnotes that enlighten very slightly. Overall, however, this book is valuable indeed in meeting a great need for a study of an eccentric Brazilian who remains one of the great heroes of his country.

GARY KUHN

University of Minnesota

*Brazil.* By ELIZABETH BISHOP and THE EDITORS OF LIFE. New York, 1962. Time Incorporated. Life World Library. Maps. Illustrations. Appendix. Index. Pp. 160.

The present work on Brazil is another volume in a current series published by *Life*. The purpose of the

series is to acquaint the reader and viewer with the nature of and the principal developments of various countries. There is no effort to be scholarly, but the editors have been careful to select competent writers and assistants. The ability of Miss Bishop to express herself clearly and succinctly and her knowledge of contemporary Brazil contributes much toward making this volume a successful one.

The selection of the pictures is likewise good, and within the purpose of the book they are most effective. Many pictures tell vivid and significant stories in themselves; no written explanation is necessary.

It is surprising how much varied information is included in this brief story of Brazil and its people. There is one area, however, which is somewhat neglected. Political leaders of the past should have at least been listed in the Appendix; it would have been better to have referred in the text to such men as Rio-Branco, Barbosa, Joaquim Nabuco, and others. They may have contributed more to Brazil than the Benjamin Constants or the Deodoro da Fonseca.

There is an Appendix that contains important dates in Brazilian history, a suggested reading list, and important figures in art, architecture, music, and literature.

Within the overall objectives of the series, *Life* has produced an interesting story about Brazil, especially contemporary Brazil.

LEON F. SENSABAUGH

Washington and Lee University

#### OTHER BOOKS RECEIVED

*Rise of the Spanish American Republics As Told in the Lives of Their Liberators.* By WILLIAM SPENCE ROBERTSON. New York, 1961. Collier Books. Bibliography. Index. Pp. 348. Paper. \$.95. It is good to have this classic of Latin American History in a most presentable paperback.

*Geopolítica del hambre. Ensayo sobre los problemas alimentarios y demográficos del mundo.* By JOSUÉ DE CAS-

TRO. Buenos Aires, 1962. Ediciones Solar. Biblioteca Dimensión Americana. Illustrations. Bibliography. Index. Pp. 409. Paper. Josué de Castro's popularity in Latin America is on the increase. Last year another edition of this book was published by the Editorial Universitaria of Santiago de Chile (previously listed by the *HAHR*). A study of Josué de Castro and his work is in order.

*Homología de términos anatómicos de uso antropológico en el hueso coxal. Latín, inglés, francés, italiano, portugués, español.* 2d ed. By SANTIAGO GENOVÉS T. and J. CARIA MENDES. México, 1962. Universidad Nacional Autónoma de México. Cuadernos del Instituto de Historia. Serie Antropología. No. 1. Bibliography. Index. Pp. 57. Paper.

*Azorín as a Literary Critic.* By EDWARD INMAN FOX. New York, 1962. Hispanic Institute in the United States. Appendix. Bibliography. Pp. 176. Paper. A stimulating book; easy to read.

*Spanish Frescos of the Romanesque Period.* Introduction by JUAN AINARD. New York, 1962. The New American Library of World Literature, Inc. A Mentor-UNESCO Art Book. Illustrations. Bibliography. Index. Pp. 28. Paper. \$ .95.

*Don Emilio Maldonado.* By P. N. TABLANTE GARRIDO. Mérida, Venezuela, 1960. Universidad de los Andes. Publicaciones del Rectorado de la Universidad de los Andes. No. 2. Illustrations. Pp. 35. Paper.

*El sitio de Cuautla.* By JULIO ZÁRATE. México, 1962. Secretaria de Gobernación. Pp. 23. Paper.

*St. Augustine.* By JACQUES CHABANNES. Translated by JULIE KERNAN. Garden City, New York, 1962. Doubleday and Company, Inc. Notes. Bibliography. Pp. 239. \$3.95.

*Vinnigulasa. Cuentos de Juchitán.* By GABRIEL LÓPEZ CHIÑAS. México, 1960. Universidad Nacional Autónoma de México. Index. Pp. 131. Paper.

*Verde memoria. Tres décadas de literatura y periodismo en una autobiografía. Los grupos de Boedo y Florida.* By ALBERTO PINETA. Buenos Aires, 1962. Ediciones Antonio Zamora. Colección Argentina. Vol. 15. Pp. 227.

*Antología poética de Guerra Junqueiro.* Edited by CAMPIO CARPIO. Buenos Aires, 1962. Editorial Claridad. Biblioteca de Joyas Literarias. Vol. 4. Index. Pp. 158.

*Eladio Segura. Novela de los Andes.* By GERARDO GALLEGOS. Buenos Aires, 1962. Editorial Claridad. Biblioteca de Grandes Novelas. Vol. 44. Index. Pp. 238.

*The Padre Island Story.* By LORAIN DALY and PAT REUMERT. San Antonio, Texas, 1962. The Naylor Company. Illustrations. Bibliography. Pp. 52. Interesting little book about that beautiful 100 mile long island between the Rio Grande and Corpus Christi.

*Mundo oscilantes. Poesía reunida.* By ADALGISA NERY. Rio de Janeiro, 1962. Livraria José Olympio. Index. Pp. xiv, 324. Paper.

*Texas in the Middle Eighteenth Century. Studies in Spanish Colonial History and Administration.* By HERBERT EUGENE BOLTON. New York, 1962. Russell and Russell, Inc. Maps. Illustrations. Bibliography. Index. Pp. xi, 501. \$15.00. This classic study was first published in 1915 in the University of California Publications in History, volume 3. It is good to know that a new edition is available.

*The California Trail. An Epic with Many Heroes.* By GEORGE R. STEWART. New York, 1962. McGraw-Hill Book Company, Inc. The American Trails Series. Maps. Illustrations. Index. Pp. 339. \$6.95. This is the fourth volume of the American Trails Series. Volume two dealt with the story of California's Spanish Mission Trail and was well received.

*Development of the Emerging Countries. An Agenda for Research.* By ROBERT E. ASHER, ET AL. Washington,

D. C., 1962. The Brookings Institution. Appendix. Index. Pp. xi, 239. Paper. \$2.75.

*Shaping the World Economy. Suggestions for an International Economic Policy.* By JAN TINBERGEN. New York, 1962. The Twentieth Century Fund, Inc. Charts. Appendices. Index. Pp. xviii, 330. Paper. \$2.25.

*The Cold War in Latin America.* By ADOLF A. BERLE, JR. Storrs, Connecticut, 1961. University of Connecticut. The Brien McMahon Lectures. Pp. 20. Paper. A useful little pamphlet stating the Berle ideas expressed in more detail in his larger publications. This was the fifth annual Brien McMahon Lecture at the University of Connecticut delivered on October 23, 1961.

*The Revolution in World Politics.* Edited by MORTON A. KAPLAN. New York, 1962. John Wiley and Sons, Inc. Index. Pp. xxii, 477. Chapter five is written by Professor George I. Blanksten and is entitled "Fidel Castro and Latin America" representing a good summary.

*Culture and Communication. The Problem of Penetrating National and*

*Cultural Boundaries.* By ROBERT T. OLIVER. Springfield, Illinois, 1962. Charles C. Thomas, Publisher. American Lecture Series. Index. Pp. xvii, 165.

*Africa at the Crossroads.* By JAMES H. ROBINSON. Philadelphia, 1962. The Westminster Press. Christian Perspectives on Social Problems. Pp. 83. Paper. \$1.95.

*Readex Microprint Publications, 1963.* New York, 1963. Readex Microprint Corporation. Bibliography. Indices. Pp. iv, 191. Paper.

*The United States' Role in Latin America.* By GEORGE I. BLANKSTEN. River Forest, Illinois, 1962. Laidlaw Brothers Publishers. Foreign Relations Series. Illustrations. Charts. Maps. Pp. 67, 21 (Study Guide). Paper. Through a grant from the Ford Foundation the North Central Association of Colleges and Secondary Schools has established a program on foreign relations for the high schools. Various pamphlets for this purpose have been published. This one by Blanksten is well done and useful for high schools.
